# Supplementary material for: Comparison of Zinc Oxide Nanoparticle Integration into Non-Woven Fabrics Using Different Functionalisation Methods for Prospective Application as Active Facemasks
Source: MDPI journal article supplement (doi:10.3390/polym15173499), 2023-08-22
Supplement: s1 [file s1]

## Supplementary Files

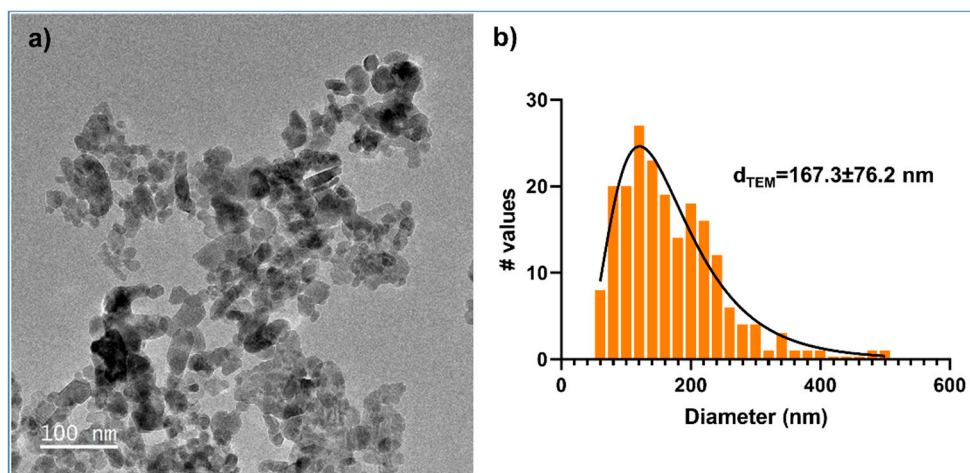

Figure S1. TEM characterisation of ZnO NPs: a) Representative image; and b) size distribution and average diameter.

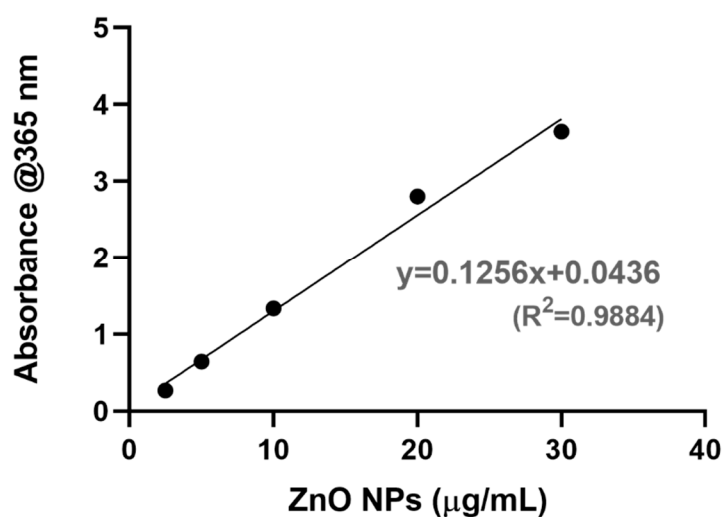

Figure S2. Calibration curve of ZnO NPs obtained from UV-Vis spectrophotometry based on the absorbance values registered at 365 nm with increasing concentration of the ZnO NPs aqueous suspensions.

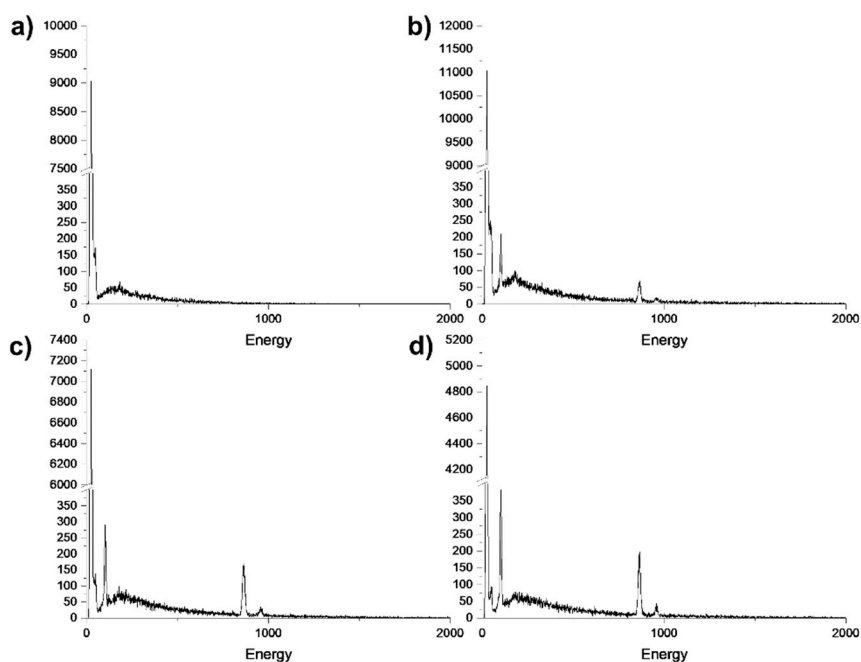

Figure S3. EDS spectra obtained for distinct NWF substrates: a) NWF2; b) Electrospinning-1.2%ZnO; c) Dip-pad-dry-1.2%ZnO; and d) Exhaustion-1.2%ZnO.

Table S1. Thermal degradation parameters determined from the experimental TGA curves.

| Samples                 | T <sub>10%</sub> (°C) | T <sub>peak</sub> (°C) | Mass residue at 500°C (%) |
|-------------------------|-----------------------|------------------------|---------------------------|
| NWF2 (control)          | 413.103               | 461.36                 | 3.854                     |
| Electrospinning-1.2%ZnO | 426.8                 | 460.98                 | 0                         |
| Electrospinning-0.3%ZnO | 422.23                | 463.15                 | 0                         |
| Dip-pad-dry-1.2%ZnO     | 421.89                | 468.56                 | 2.37                      |
| Dip-pad-dry-0.3%ZnO     | 422.97                | 461.27                 | 1.70                      |
| Exhaustion-1.2%ZnO      | 422.06                | 462.80                 | 0.83                      |
| Exhaustion-0.3%ZnO      | 427.37                | 466.19                 | 3.88                      |
